# Supplementary material
Source: Springer Nature journal article supplement (https://www.springermedizin.de/resource/supplementary/12963_2011_197_MOESM1_ESM.pdf/9572326)

# Additional file 1.

## Literature search strategy for bipolar disorder health states.

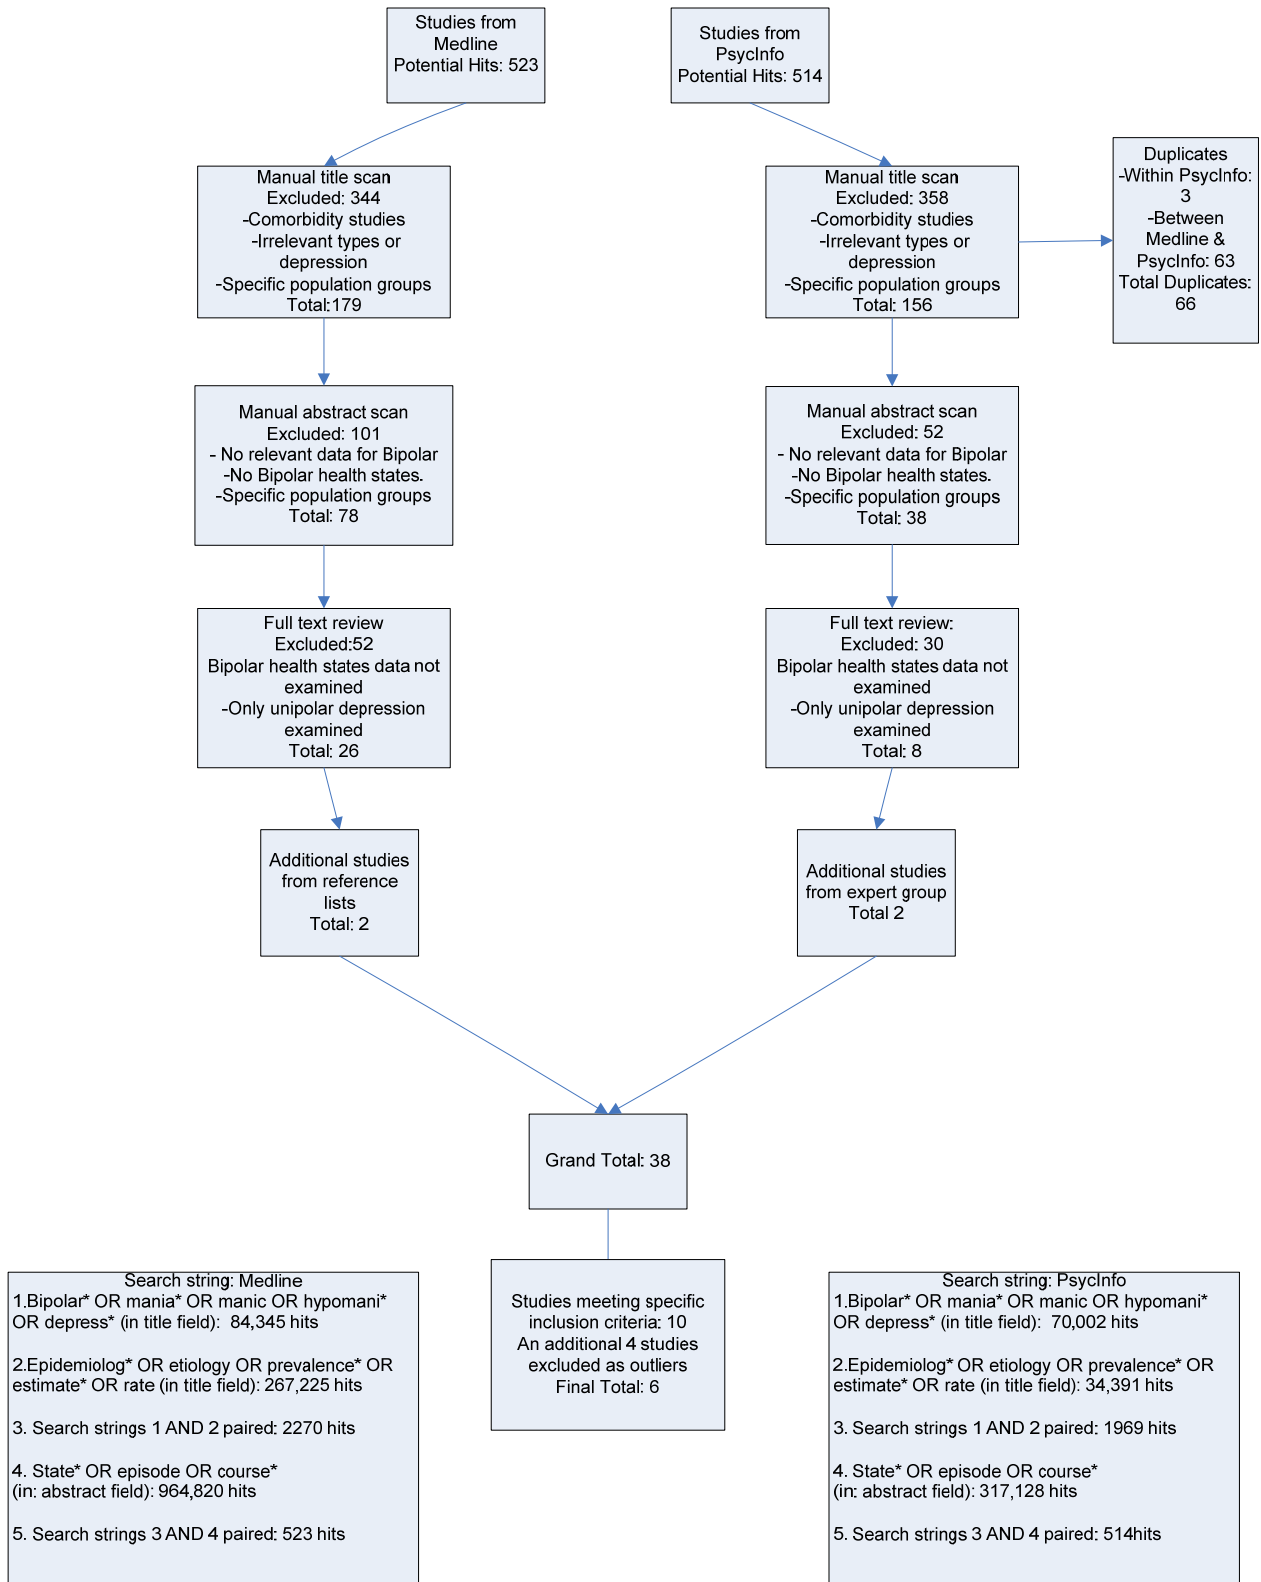

Supplement: MOESM1 [file 9572326]
